# Supplementary material for: Expanding the limits of laser-ablation U–Pb calcite geochronology
Source: Copernicus journal article supplement (doi:10.5194/gchron-2-343-2020), 2020-11-23
Supplement: Supplementary file 1 [file gchron-2-343-2020-supplement.zip]

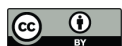

*Supplement of*

## **Expanding the limits of laser-ablation U–Pb calcite geochronology**

**Andrew R. C. Kylander-Clark**

*Correspondence to:* Andrew R. C. Kylander-Clark ([akylander@ucsb.edu](mailto:akylander@ucsb.edu))

- [gchron-2-343-2020-supplement-title-page.pdf](#)
- [DR1 U-Pb data.xlsx](#)

The copyright of individual parts of the supplement might differ from the CC BY 4.0 License.
